# Supplementary material for: Contribution of Traditional Ecological Knowledge of Pastoral Communities in Sustainable Rangeland Management in Nepal
Source: Research Square preprint supplement (doi:10.21203/rs.3.rs-6816057/v1), 2025-06-19
Supplement: Supplementary file 1 [file b105b730d2c987ee3b11036a.docx]

**KEY INFORMANT INTERVIEW QUESTIONNAIRE**

**CONSENT FORM**

Tittle of research: Restoring rangeland ecosystem through community-based management in Karnali

Principle investigator:

Email: | Phone:

____________________________________________________________________________

Dear Respondent,

Namaste!!

The purpose of this survey is to assess the status and challenges of traditional ecological knowledge of pastoralism communities in the Western region of Nepal for a research project conducted by the XX. Please note that there is no monetary or other compensation for participating in this survey, and your participation is completely voluntary. If you feel uncomfortable, you are free to escape the question or quit this interview at any time. The results of this survey will be used for research, education, and policy-making purposes. We will share the results of this survey with you in the form of reports and research articles while maintaining the anonymity of the respondents and not revealing/sharing preliminary data publicly. We appreciate your time and participation in this survey.

Thank you.

Can we now start our interview?

 Yes, I am consenting to participate

 No, I am NOT consenting to participate

____________________________________________________________________________

**For official Use**

| Date: | Interview Number: |
| --- | --- |
| Interviewer Name |  |
| Start Time |  |
| End Time |  |
| Time Taken: |  |

**KEY INFORMANT INTERVIEW QUESTIONNAIRE**

1. **SOCIO-DEMOGRAPHIC INFORMATION**

| 1. Name: | 1. District: |
| --- | --- |
| 1. Municipality: | 1. Ward: |
| 1. Age: | 1. Gender: |
| 1. Educational Qualification: | |
| 1. Illiterate | 1. Informal education |
| 1. Up to high School | 1. Above high School |
| 1. Household size: | |
| 1. Secondary occupation: | |
| 1. Agriculture | 1. Small business |
| 1. Job | 1. Livestock rearing |
| 1. NTFP collection | 1. Wage labour |
| 1. Remittance | 1. Pension |
| 1. Others | |
| 1. Person of a family member residing outside the country: | |
| 1. How long has your family been involved in herding? | |
| 1. Less than 10 years | 1. 10-20 years |
| 1. 20-50 years | 1. More than 50 years |
| 1. Types and number of livestock your family is holding nowadays. | |
| Goats: | Goats: |
| Horse: | Horse: |
| Mules: | Mules: |
| Donkey: | Donkey: |
| Cow: | Others: |
| 1. Annual Income of Family | |
| 1. less than 1 lakh | 1. less than 1 lakh |
| 1. 2 to 5 lakhs | 1. 2 to 5 lakhs |
| 1. More than 10 lakhs |  |
| 1. Income from herding | |
| 1. less than 1 lakh | 1. less than 1 lakh |
| 1. 2 to 5 lakhs | 1. 2 to 5 lakhs |
| 1. More than 10 lakhs |  |

1. **ABOUT PASTORALISM**

| 1. What are the major factors you consider when and where to migrate with your herd? (Select all that apply) | |
| --- | --- |
| 1. Forage availability | 1. Water sources |
| 1. Climatic conditions | 1. Market access |
| 1. Social factors (e.g., festivals, family events) | 1. Others (Specify): |
| 1. How do you determine the duration of stay in any specific location for grazing? | |
| 1. Availability of grass | 1. Weather |
| 1. Traditional grazing calendar | 1. Availability of water |
| 1. Others (Specify): | |

| 1. How do you identify different plant species (palatable or non-palatable) in the rangeland? | | |
| --- | --- | --- |
| 1. Through family knowledge | | 1. Community sharing |
| 1. Personal experience | | 1. Watching livestock grazing behavior |
| 1. Visual Characteristics | | 1. From other sources (specify): |
| 1. What traditional medicines or medicinal plants do you use in traditional medicine for livestock healing? | | |
| Name of plant used | Name of disease | How do you prepare those plants for medicinal use, and which part do you use? (Grinding, Boiling, Mixing) |
|  |  |  |
|  |  |  |
|  |  |  |
|  |  |  |
|  |  |  |
| 1. Is there any traditional method your community uses to manage and protect these valuable plant species in your rangelands? | | |
| 1. Selective harvesting | | 1. Controlled grazing |
| 1. Declaration of sacred sites | | 1. Others (specify): |
| 1. What remedies or treatments do you use for common livestock diseases? | | |
| 1. Visit Dami/ Jhakri | | 1. Visit Lama |
| 1. Use of home remedies | | 1. Use of plant-based medicines |
| 1. Visit veterinary | | 1. Others (specify): |
| 1. Are specific rituals or traditional practices performed to prevent the spread of that disease to other livestock in your herd? | | |
| 1. Traditional Practices and Rituals | | 1. Regular health monitoring of livestock |
| 1. Construction of a shelter in an isolated area | | 1. Grazing Management |
| 1. Others (Specify): | | |
| 1. How effective are these traditional treatments in curing diseases and maintaining livestock health? | | |
| 1. Very effective | | 1. Effective |
| 1. Not so effective | | 1. A little bit Effective |
| 1. Not effective at all | |  |
| 1. What are the main challenges of using these traditional treatment methods? | | |
| 1. Inconsistent results | | 1. Scarcity of traditional resources (medicinal plants) |
| 1. Time-consuming in preparation | | 1. Slow result |
| 1. Changing cultural attitudes towards traditional practices | | 1. Lack of skilled manpower or knowledge about those remedies |
| 1. Replacement of traditional medicine by veterinary medicine | | 1. Others (Specify): |
| 1. Are there any cultural or societal myths for any gender or ethnicity restrictions in rangeland? If “Yes”, please explain that restriction. | | |
|  | | |

1. **ABOUT RANGELAND CHANGE**

| 1. How would you rate the current condition of rangelands compared to a decade ago? | |
| --- | --- |
| 1. Much better | 1. Better |
| 1. Same | 1. Worse |
| 1. Much worse |  |
| 1. Have you noticed the expansion of non-palatable species in the rangeland? Can you tell me the names of those species? | |
| 1. Are the younger generation of your family interested in the herding profession? | |
| 1. Not interested at all | 1. Slightly interested |
| 1. Moderately interested | 1. Very interested |
| 1. Extremely interested |  |
| 1. What challenges do you think the future generation will face in continuing the herding profession? (Select all that apply) | |
| 1. Climate change | 1. Economic instability |
| 1. Loss of grazing lands | 1. Urbanization and migration |
| 1. Lack of interest in traditional practices | 1. Other (please specify) |
| 1. What specific challenges have you faced due to rangeland changes? | |
| 1. Water scarcity | 1. Lack of enough fodder |
| 1. Poor forage quality | 1. Livestock health issues |
| 1. Reduced income | 1. Increased conflicts over resources |
| 1. Others (specify) | |

**FOCUS GROUP DISCUSSION**

| 1. Please tell us about the main time of bringing cattle sheep, and goats to graze in Khark and about that cycle. Can you make a map and show it? |
| --- |
|  |
| 1. Please state any traditional cultural practices related to rangeland management that are still being followed or relevant for the sustainability of rangelands. |
|  |
| 1. How effective do you think these practices are in sustaining the rangelands? |
|  |
| 1. If there is a need to improve the efforts being made here for the sustainable management of rangeland, what could they be? How can it solve the challenges that rangeland is currently facing? |
|  |
| 1. What is the role of locals in such a rangeland management system? How can their role and participation be increased? |
|  |
| 1. Are you aware of any government regulations or policies about rangeland management? If yes, can you please explain a little about it. |
|  |
| 1. Are there any collaborative efforts between communities and external organizations to manage rangeland changes? |
|  |
| 1. Is there any conflict between the stakeholders (pastoralists, local communities, and the community forest local government) regarding the use and management of rangeland in this place? |
|  |
| 1. What are the main causes of conflict? (e.g., resource scarcity, ownership of rangeland, boundaries of rangeland)? |
|  |
| 1. What mechanisms and processes, including traditional conflict resolution mechanisms, are currently in place to resolve conflicts in rangelands? |
|  |
| 1. How effective are these mechanisms in resolving conflicts and preventing their recurrence? |
|  |

| Table 1: Details of the data collection methods | | | |
| --- | --- | --- | --- |
| Data collection tool | **Patarasi RM** | **Guthichaur RM** | **Total** |
| Focus group discussion (FGDs) | 7 (98 participants including 18 female) | 5 (72 participants including 20 female) | 12 |
| Key informant interview (KIIs) | 30 (29 male, 1 female) | 73 (56 male, 17 female) | 103 |
| Participatory mapping | 7 (98 participants including 18 female) | 5 (72 participants including 20 female) | 12 |

|  |  |
| --- | --- |
